# Supplementary material for: Honeycomb-like Hierarchical Porous Carbon from Lignosulphonate by Enzymatic Hydrolysis and Alkali Activation for High-Performance Supercapacitors
Source: MDPI journal article supplement (doi:10.3390/en16093824), 2023-04-29
Supplement: s1 [file s1]

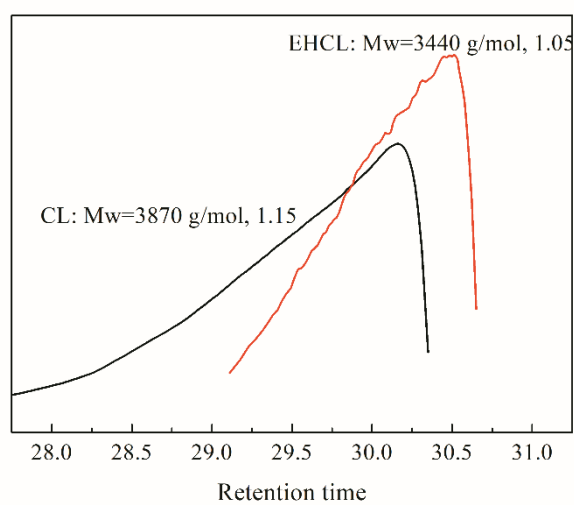

**Figure S1.** GPC curves of CL and EHCL.

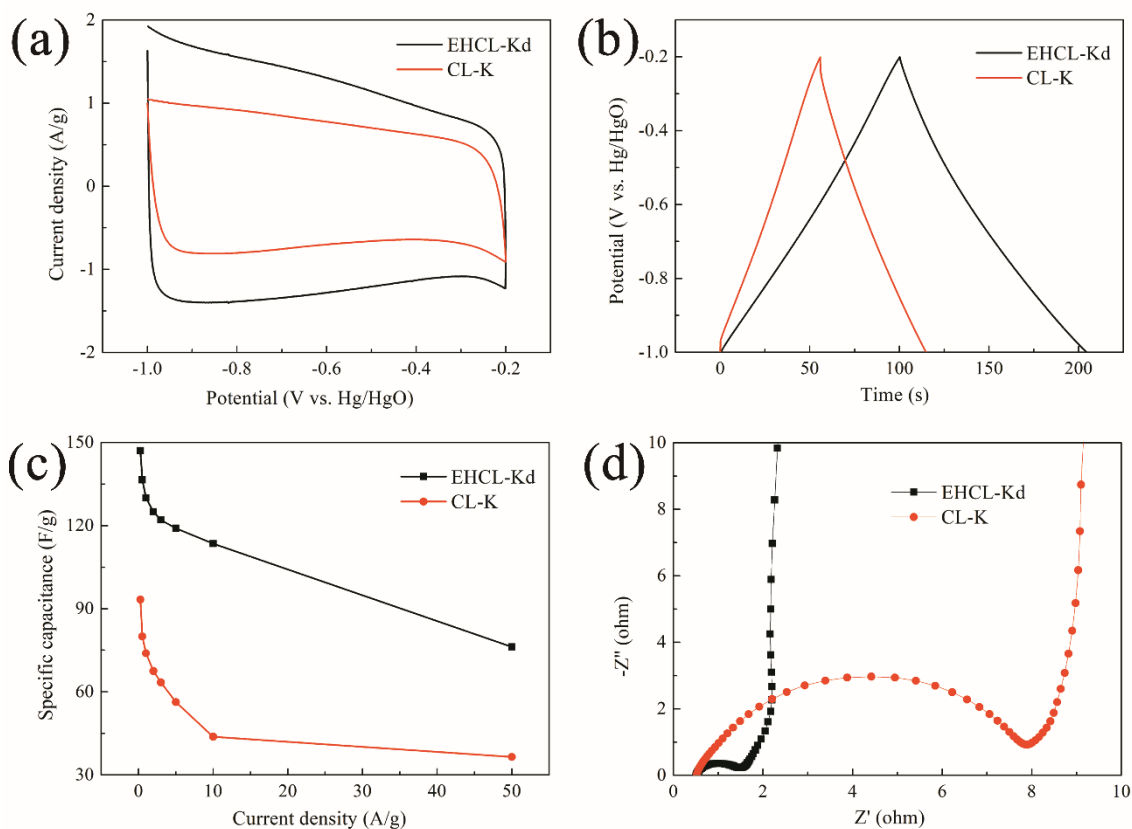

**Figure S2.** (a) CV curves at 100 mV/s, (b) GCD curves at 1 A/g, (c) rate performance of a three-electrode system in 6 M KOH, and (d) Nyquist plots of CL-K and EHCL-Kd.
